# Supplementary material
Source: Springer Nature journal article supplement (https://www.springermedizin.de/resource/supplementary/12889_2007_1323_MOESM3_ESM.pdf/9502966)
Supplement: MOESM3 [file 9502966]

Table 5: Full correlation matrix of variables depicting psychosocial work environment and outcomes (German COPSQ version),  $N$ s ranged from 281 to 296. Values on diagonal: Cronbach's alpha of the scale in our sample, missing values indicate single items of indices. \* = ( $p < .05$ ), \*\* = ( $p < .01$ )

| Variables                         | 1.     | 2.     | 3.     | 4.     | 5.     | 6.     | 7.     | 8.     | 9.     | 10.    | 11.    |
|-----------------------------------|--------|--------|--------|--------|--------|--------|--------|--------|--------|--------|--------|
| 1. Work-Family Conflict (WIF)     | (.92)  |        |        |        |        |        |        |        |        |        |        |
| 2. quantitative demands           | .57**  | (.73)  |        |        |        |        |        |        |        |        |        |
| 3. cognitive demands              | .24**  | .37**  | (.69)  |        |        |        |        |        |        |        |        |
| 4. emotional demands              | .28**  | .30**  | .38**  | (.72)  |        |        |        |        |        |        |        |
| 5. demands for hiding emotions    | .15*   | .17**  | .09    | .15*   | (.73)  |        |        |        |        |        |        |
| 6. influence at work              | -.22** | -.02   | .34**  | -.00   | -.31** | (.79)  |        |        |        |        |        |
| 7. possibilities for development  | -.07   | .08    | .45**  | .25**  | -.36** | .51**  | (.77)  |        |        |        |        |
| 8. workplace commitment           | -.03   | .10    | .22**  | .25**  | -.23** | .31**  | .50**  | (.69)  |        |        |        |
| 9. role clarity                   | -.30** | -.13*  | .25**  | -.07   | -.27** | .42**  | .44**  | .20**  | (.84)  |        |        |
| 10. role conflict                 | .28**  | .28**  | .15*   | .12*   | .44**  | -.12*  | -.18** | -.08   | -.38** | (.73)  |        |
| 11. quality of leadership         | -.13*  | -.20** | -.11   | -.12*  | -.37** | .15*   | .28**  | .27**  | .19**  | -.33** | (.85)  |
| 12. sense of community            | -.20** | -.16** | -.11   | -.05   | -.29** | .06    | .20**  | .16**  | .26**  | -.32** | .31**  |
| 13. relational justice            | -.11   | -.14*  | -.04   | -.08   | -.45** | .21**  | .28**  | .30**  | .27**  | .38**  | .69**  |
| 14. intention to leave the job    | .37**  | .24**  | .05    | .18**  | .34**  | -.25** | -.30** | -.23** | -.28** | .23**  | -.18** |
| 15. job satisfaction              | -.36** | -.21** | .05    | -.06   | -.38** | .41**  | .47**  | .41**  | .29**  | -.34** | .42**  |
| 16. work ability (0-100)          | -.30** | -.22** | -.00   | -.10   | -.19** | .23**  | .24**  | .10    | .23**  | -.23** | .25**  |
| 17. general health status (0-100) | -.26** | -.20** | -.01   | -.10   | -.13*  | .08    | .13*   | .00    | .20**  | -.15*  | .17**  |
| 18. personal burnout              | .55**  | .41**  | .07    | .32**  | .23**  | -.36** | -.16** | -.05   | -.40** | .34**  | -.17** |
| 19. behavioural stress symptoms   | .58**  | .41**  | .07    | .26**  | .25**  | -.34** | -.19** | -.09   | -.43** | .36**  | -.21** |
| 20. cognitive stress symptoms     | .31**  | .20**  | -.10   | .11    | .25**  | -.27** | -.23** | -.03   | -.42** | .33**  | -.12*  |
| 21. life satisfaction             | -.42** | -.25** | .03    | -.16** | -.26** | .24**  | .31**  | .18**  | .27**  | -.21** | .23**  |
| continued...                      | 12.    | 13.    | 14.    | 15.    | 16.    | 17.    | 18.    | 19.    | 20.    | 21.    |        |
| 12. sense of community            | (.80)  |        |        |        |        |        |        |        |        |        |        |
| 13. relational justice            | .36**  | (.88)  |        |        |        |        |        |        |        |        |        |
| 14. intention to leave the job    | -.23** | -.22** |        |        |        |        |        |        |        |        |        |
| 15. job satisfaction              | .28**  | .39**  | -.51** | (.71)  |        |        |        |        |        |        |        |
| 16. work ability (0-100)          | .22**  | .29**  | -.44** | .48**  |        |        |        |        |        |        |        |
| 17. general health status (0-100) | .20**  | .16**  | -.26** | .29**  | .72**  |        |        |        |        |        |        |
| 18. personal burnout              | -.23** | -.23** | .41**  | -.46** | -.58** | -.45** | (.90)  |        |        |        |        |
| 19. behavioural stress symptoms   | -.28** | -.28** | .36**  | -.41** | -.49** | -.41** | .75**  | (.86)  |        |        |        |
| 20. cognitive stress symptoms     | -.16** | -.25** | .24**  | -.29** | -.43** | -.35** | .56**  | .60**  | (.86)  |        |        |
| 21. life satisfaction             | .24**  | .20**  | -.38** | .41**  | .45**  | .37**  | -.48** | -.47** | -.32** | (.87)  |        |
